# Supplementary material for: Analysis of dermal exposure assessment in the US Environmental Protection Agency Toxic Substances Control Act risk evaluations of chemical manufacturing
Source: PubMed Central journal article supplement — Toxicol Ind Health. 2022 Nov 24;39(1):49–65. doi: 10.1177/07482337221140946 (PMC9817111; doi:10.1177/07482337221140946), 2022-11-24
Supplement: sj-pdf-1-tih-10.1177_07482337221140946.pdf [file sj-pdf-1-tih-10.1177_07482337221140946.pdf]

## Supplemental Files

**Table S-1: IH SkinPerm Parameters for Scenario 1: Instantaneous Dermal Exposure for TCE and CTC**

| Scenario Parameter            | Value                    | Rationale and Assumptions                                                                                                                                                                                                                                                                                                                                                                                                                                                                                                                                  |
|-------------------------------|--------------------------|------------------------------------------------------------------------------------------------------------------------------------------------------------------------------------------------------------------------------------------------------------------------------------------------------------------------------------------------------------------------------------------------------------------------------------------------------------------------------------------------------------------------------------------------------------|
| Instantaneous deposition dose | 749 mg/event             | Calculated using EPA's Assumed $Q_u$ and S values (refer to Table 2).                                                                                                                                                                                                                                                                                                                                                                                                                                                                                      |
| Affected skin area            | 535 cm <sup>2</sup>      | Surface area of one hand (same as EPA model).                                                                                                                                                                                                                                                                                                                                                                                                                                                                                                              |
| Maximum skin adherence        | 0.584 mg/cm <sup>2</sup> | <p>The skin adherence was assumed to be equal to 0.0004 (cm) x density (mg/cm<sup>3</sup>) based on assumptions of 20 μm stratum corneum thickness and 20% stratum corneum saturation volume (Tibaldi et al., 2014); The density of pure TCE and CTC are both 1.46 g/cm<sup>3</sup> as reported in the Final EPA Risk Evaluation documents (USEPA, 2020a Table 1-1, p. 41 and USEPA, 2020b Table 1-1, p. 30).</p> <p>It was assumed that any additional TCE or CTC loaded beyond the film thickness rolled off of the skin or was washed off the skin.</p> |
| Thickness of stagnant air     | 1 cm                     | Assumes no gloves, based on recommendation from Tibaldi et al. (2014) for bare skin.                                                                                                                                                                                                                                                                                                                                                                                                                                                                       |
| Weight fraction of TCE/CTC    | 1                        | Default value that assumes 100% TCE/CTC (same as EPA model)                                                                                                                                                                                                                                                                                                                                                                                                                                                                                                |
| Timing Parameters             | Value or Selection       | Rationale                                                                                                                                                                                                                                                                                                                                                                                                                                                                                                                                                  |
| Start of deposition           | 0 h                      | Instantaneous deposition of TCE begins at start of loading/unloading task. Assumes all of TCE was deposited at the beginning of each event (to simulate a wetting or soaking of hands during sample collection or connection of transfer lines).                                                                                                                                                                                                                                                                                                           |
| End time observation          | 0.25, 0.5, or 1 h        | Observation time is set at 0.25, 0.5, or 1 hour, to simulate the duration of the task and assumption that the hands are washed at the end of the observation period. There is potential for additional absorption past the observation period.                                                                                                                                                                                                                                                                                                             |

**Table S-2: IH SkinPerm Parameters for Scenario 2: Constant Dose Dermal Exposure to TCE and CTC**

| <b>Scenario Parameter</b>  | <b>Value</b>                                                                                                                                                                | <b>Rationale and Assumptions</b>                                                                                                                                                                                                                                                                                                                                                                                |
|----------------------------|-----------------------------------------------------------------------------------------------------------------------------------------------------------------------------|-----------------------------------------------------------------------------------------------------------------------------------------------------------------------------------------------------------------------------------------------------------------------------------------------------------------------------------------------------------------------------------------------------------------|
| Affected skin area         | 535 cm <sup>2</sup>                                                                                                                                                         | Surface area of one hand (same as EPA model).                                                                                                                                                                                                                                                                                                                                                                   |
| Maximum skin adherence     | 0.584 mg/cm <sup>2</sup>                                                                                                                                                    | The maximum volume for absorption assumed to be 0.0004 (cm) x density (mg/cm <sup>3</sup> ) based on assumptions of 20 μm stratum corneum thickness and 20% stratum corneum saturation volume (Tibaldi et al., 2014); The density of pure TCE and CTC are both 1.46 g/cm <sup>3</sup> as reported in the Final EPA Risk Evaluation documents (USEPA, 2020a Table 1-1, p. 41 and USEPA, 2020b Table 1-1, p. 30). |
| Dermal deposition rate     | 5.6 mg/cm <sup>2</sup> /h<br>(assuming 15 min event)<br><br>2.8 mg/cm <sup>2</sup> /h<br>(assuming 30 min event)<br><br>1.4 mg/cm <sup>2</sup> /h<br>(assuming a 1 h event) | Based on EPA estimation of Q <sub>u</sub> (quantity remaining on skin) loading and assumes mass loading is uniformly spread over 0.25, 0.5 or 1 h exposure event.                                                                                                                                                                                                                                               |
| Thickness of stagnant air  | 1 cm                                                                                                                                                                        | Assumes no gloves, based on recommendation from Tibaldi et al. (2014) for bare skin.                                                                                                                                                                                                                                                                                                                            |
| Weight fraction of TCE/CTC | 1                                                                                                                                                                           | Default value that assumes 100% TCE or CTC (Same as EPA model).                                                                                                                                                                                                                                                                                                                                                 |
| <b>Timing Parameters</b>   |                                                                                                                                                                             | <b>Rationale and Assumptions</b>                                                                                                                                                                                                                                                                                                                                                                                |
| Start of deposition        | 0 h                                                                                                                                                                         | Instantaneous deposition of TCE or CTC begins at start of the task, such as collecting a sample or connecting a transfer line (TCE).                                                                                                                                                                                                                                                                            |
| Duration of deposition     | 0.25, 0.5 or 1 h                                                                                                                                                            | Based on the assumption of dripping or minimal contact loading for ongoing work on a task (e.g. a maintenance task) estimation of between 15 minutes (0.25 h), 30 minutes (0.5 h), or 1 hour (1 h). Represents constant dose of TCE over task time.                                                                                                                                                             |

| Scenario Parameter | Value              | Rationale and Assumptions                                                                                                                                                                                                                                                                              |
|--------------------|--------------------|--------------------------------------------------------------------------------------------------------------------------------------------------------------------------------------------------------------------------------------------------------------------------------------------------------|
| End time           | 0.25, 0.5 h or 1 h | Based on the assumption of dripping or minimal contact loading for ongoing work on a task (e.g. a maintenance task) estimation of between 15 minutes (0.25 h), 30 minutes (0.5 h), or 1 hour (1 h). There is potential for additional absorption past the observation period (assumes no handwashing). |

References:

US EPA 2020a. Risk Evaluation for Trichloroethylene CASRN: 79-01-6. Book Risk Evaluation for Trichloroethylene CASRN: 79-01-6, U.S.

Environmental Protection Agency (EPA).

USEPA 2020b. Risk Evaluation for Carbon Tetrachloride (Methane, Tetrachloro-) CASRN: 56-23-5, U.S. Environmental Protection Agency (EPA).

**Table S-3. Summary of IH SkinPerm Results for Instantaneous and Constant Exposure Scenarios for TCE**

| <b>Scenario 1 - Instantaneous Dermal Exposure</b> |                                                   |                                       |                                                                         |
|---------------------------------------------------|---------------------------------------------------|---------------------------------------|-------------------------------------------------------------------------|
| <b>Observation Time</b>                           | <b>Absorbed fraction % (<math>f_{abs}</math>)</b> | <b>Amount absorbed (mg) per event</b> | <b>Total absorbed dose per workday<sup>a</sup> (mg/day) (mg/kg/day)</b> |
| 15 min (0.25 h)                                   | 0.262% (0.00262)                                  | 1.96                                  | 15.68 (0.196)                                                           |
| 30 min (0.5 h)                                    | 0.340% (0.00340)                                  | 2.54                                  | 10.16-20.32 (0.127-0.254)                                               |
| 60 min (1 h)                                      | 0.370% (0.00370)                                  | 2.77                                  | 22.16 (0.277)                                                           |
| <b>Scenario 2 - Constant Dose Dermal Exposure</b> |                                                   |                                       |                                                                         |
| <b>Duration of Deposition</b>                     | <b>Absorbed fraction % (<math>f_{abs}</math>)</b> | <b>Amount absorbed (mg) per event</b> | <b>Total absorbed dose per workday<sup>a</sup> (mg/day) (mg/kg/day)</b> |
| 15 min (0.25 h)                                   | 0.416% (0.00416)                                  | 3.12                                  | 24.96 (0.312)                                                           |
| 30 min (0.5 h)                                    | 0.700% (0.00700)                                  | 5.24                                  | 20.96-41.92 (0.262-0.524)                                               |
| 60 min (1 h)                                      | 1.04% (0.0104)                                    | 7.78                                  | 62.24 (0.778)                                                           |

<sup>a</sup> For 15 min duration - assume application of 8 times per day; for 30 min duration - assume application 4 or 8 times per day; for 60 min duration - assume 8 events per day. Absorbed dose in mg/kg/day was calculated by dividing the mg/day by typical worker body weight, or 80 kg.

**Table S-4. Summary of IH SkinPerm Results for Instantaneous and Constant Exposure Scenarios for CTC**

| <b>Scenario 1 - Instantaneous Dermal Exposure</b> |                                                   |                                       |                                                                         |
|---------------------------------------------------|---------------------------------------------------|---------------------------------------|-------------------------------------------------------------------------|
| <b>Observation Time</b>                           | <b>Absorbed fraction % (<math>f_{abs}</math>)</b> | <b>Amount absorbed (mg) per event</b> | <b>Total absorbed dose per workday<sup>a</sup> (mg/day) (mg/kg/day)</b> |
| 15 min (0.25 h)                                   | 0.132% (0.00132)                                  | 0.987                                 | 7.90 (0.0990)                                                           |
| 30 min (0.5 h)                                    | 0.174% (0.00174)                                  | 1.30                                  | 5.20-10.40 (0.065-0.130)                                                |
| 60 min (1 h)                                      | 0.192% (0.00192)                                  | 1.44                                  | 11.52 (0.144)                                                           |
| <b>Scenario 2 - Constant Dose Dermal Exposure</b> |                                                   |                                       |                                                                         |
| <b>Duration of Deposition</b>                     | <b>Absorbed fraction % (<math>f_{abs}</math>)</b> | <b>Amount absorbed (mg) per event</b> | <b>Total absorbed dose per workday<sup>a</sup> (mg/day) (mg/kg/day)</b> |
| 15 min (0.25 h)                                   | 0.194% (0.00194)                                  | 1.45                                  | 11.60 (0.145)                                                           |
| 30 min (0.5 h)                                    | 0.329% (0.00329)                                  | 2.46                                  | 9.84-19.68 (0.123-0.246)                                                |
| 60 min (1 h)                                      | 0.495% (0.00495)                                  | 3.70                                  | 29.60 (0.370)                                                           |

<sup>a</sup> For 15 min duration - assume application of 8 times per day; for 30 min duration - assume application 4 or 8 times per day; for 60 min duration - assume 8 events per day. Absorbed dose in mg/kg/day was calculated by dividing the mg/day by typical worker body weight, or 80 kg (Table 3).
